# Supplementary material for: Solubility and Stability of Carotenoids in Ammonium- and Phosphonium-Based Ionic Liquids: Effect of Solvent Nature, Temperature and Water
Source: MDPI journal article supplement (doi:10.3390/molecules28083618), 2023-04-21
Supplement: s1 [file s1]

## Supplementary materials

**Table S1** Effect of temperature on the densities ( $\rho$ ), molar volumes ( $V_m$ ), Isobaric expansion coefficient ( $\alpha_p$ ) pH, conductivity ( $\sigma$ ) and viscosity( $\eta$ ) of the ILs containing 20% water at atmospheric pressure

\*The ND means not measurable

| IL                                      | Temperature (K) | $\rho$ (g/cm <sup>3</sup> ) | $V_m$ (cm <sup>3</sup> ·mol <sup>-1</sup> ) | $\alpha_p$ | pH    | $\sigma$ (ms·cm <sup>-1</sup> ) | $\eta$ (mpa·s) |
|-----------------------------------------|-----------------|-----------------------------|---------------------------------------------|------------|-------|---------------------------------|----------------|
| [N <sub>4444</sub> ]Br                  | 298.15          | 1.0483                      | 57.7415                                     | 4.7068     | 6.66  | 5.23                            | 58.90          |
|                                         | 308.15          | 1.0432                      | 58.0221                                     | 4.7290     | 6.65  | 7.08                            | 41.92          |
|                                         | 318.15          | 1.0386                      | 58.2796                                     | 4.7515     | 6.62  | 8.69                            | 32.11          |
|                                         | 328.15          | 1.0322                      | 58.6415                                     | 4.7742     | 6.50  | 10.31                           | 24.97          |
|                                         | 338.15          | 1.0265                      | 58.9660                                     | 4.7971     | 6.40  | 11.71                           | 20.82          |
| [N <sub>4444</sub> ]Cl                  | 298.15          | 0.9410                      | 62.5307                                     | 5.2865     | 8.19  | 6.77                            | 55.12          |
|                                         | 308.15          | 0.9319                      | 63.1440                                     | 5.3146     | 7.78  | 8.35                            | 40.83          |
|                                         | 318.15          | 0.9294                      | 63.3132                                     | 5.3430     | 7.91  | 10.53                           | 27.63          |
|                                         | 328.15          | 0.9240                      | 63.6832                                     | 5.3717     | 7.72  | 12.12                           | 21.89          |
|                                         | 338.15          | 0.9189                      | 64.0360                                     | 5.4007     | 7.84  | ND                              | 18.25          |
| [N <sub>4444</sub> ]CF <sub>3</sub> COO | 298.15          | 1.0280                      | 59.8992                                     | 5.7859     | 10.97 | 4.15                            | 38.33          |
|                                         | 308.15          | 1.0190                      | 60.4295                                     | 5.8196     | 10.77 | 5.22                            | 29.20          |
|                                         | 318.15          | 1.0131                      | 60.7796                                     | 5.8537     | 10.79 | 6.63                            | 23.16          |
|                                         | 328.15          | 1.0051                      | 61.2652                                     | 5.8881     | 11.03 | 7.86                            | 17.45          |
|                                         | 338.15          | 0.9987                      | 61.6566                                     | 5.9230     | 11.13 | 8.50                            | 14.69          |
| [P <sub>4444</sub> ]Br                  | 298.15          | 1.0353                      | 59.5703                                     | 6.0967     | 2.52  | 7.92                            | 46.23          |
|                                         | 308.15          | 1.0256                      | 60.1387                                     | 6.1103     | 2.42  | 10.15                           | 29.61          |
|                                         | 318.15          | 1.0179                      | 60.6012                                     | 6.1525     | 2.09  | 12.02                           | 26.10          |
|                                         | 328.15          | 1.0110                      | 61.0184                                     | 6.2149     | 1.92  | 12.88                           | 22.74          |
|                                         | 338.15          | 1.0046                      | 61.4121                                     | 6.2565     | 1.71  | ND                              | 20.78          |
| [P <sub>4444</sub> ]Cl                  | 298.15          | 0.9475                      | 62.8605                                     | 6.4350     | 6.32  | 7.44                            | 43.08          |
|                                         | 308.15          | 0.9388                      | 63.4383                                     | 6.4767     | 6.21  | 9.37                            | 30.49          |
|                                         | 318.15          | 0.9373                      | 63.5418                                     | 6.5189     | 6.17  | 11.59                           | 24.63          |
|                                         | 328.15          | 0.9289                      | 64.1151                                     | 6.5617     | 6.08  | 12.60                           | 19.59          |
|                                         | 338.15          | 0.9248                      | 64.4014                                     | 6.6050     | 5.94  | ND                              | 16.19          |
| [P <sub>4444</sub> ]CF <sub>3</sub> COO | 298.15          | 1.0293                      | 60.7481                                     | 6.9040     | 4.61  | 5.35                            | 30.31          |
|                                         | 308.15          | 1.0251                      | 61.2432                                     | 6.9589     | 4.47  | 7.02                            | 23.85          |
|                                         | 318.15          | 1.0219                      | 61.7074                                     | 7.0147     | 4.43  | 8.58                            | 19.27          |
|                                         | 328.15          | 1.0145                      | 62.1128                                     | 7.0714     | 4.23  | 9.59                            | 15.52          |
|                                         | 338.15          | 1.0112                      | 62.6953                                     | 7.1290     | 4.23  | 10.89                           | 13.84          |
| [P <sub>4448</sub> ]Cl                  | 298.15          | 0.9369                      | 65.3378                                     | 7.4691     | 1.71  | 4.49                            | 66.32          |
|                                         | 308.15          | 0.9261                      | 66.0998                                     | 7.5172     | 1.69  | 5.37                            | 47.59          |
|                                         | 318.15          | 0.9208                      | 66.4838                                     | 7.5659     | 1.64  | 6.59                            | 35.11          |
|                                         | 328.15          | 0.9164                      | 66.7994                                     | 7.6153     | 1.59  | 7.80                            | 26.44          |
|                                         | 338.15          | 0.9113                      | 67.1733                                     | 7.6654     | 1.57  | 8.82                            | 21.34          |

**Table S2** Effect of water content on the densities ( $\rho$ ), molar volumes ( $V_m$ ),  $pH$ , conductivity ( $\sigma$ ) and viscosity( $\eta$ ) of the IL/ water systems at T = (298.15) K and at atmospheric pressure.

| IL                                      | $w_{\text{water}}$ | $\rho$ (g/cm <sup>3</sup> ) | $V_m$ (cm <sup>3</sup> ·mol <sup>-1</sup> ) | pH    | $\sigma$ (ms·cm <sup>-1</sup> ) | $\eta$ (mpa·s) |
|-----------------------------------------|--------------------|-----------------------------|---------------------------------------------|-------|---------------------------------|----------------|
| [N <sub>4444</sub> ]Br                  | 10%                | 1.0504                      | 105.4439                                    | 6.59  | 1.93                            | 118.90         |
|                                         | 20%                | 1.0483                      | 66.2872                                     | 6.23  | 6.47                            | 58.90          |
|                                         | 30%                | 1.0437                      | 48.3886                                     | 6.09  | 11.03                           | 25.66          |
|                                         | 40%                | 1.0368                      | 38.2450                                     | 6.01  | 14.66                           | 18.36          |
|                                         | 50%                | 1.0324                      | 31.5753                                     | 5.89  | 16.86                           | 12.49          |
| [N <sub>4444</sub> ]Cl                  | 10%                | 0.9570                      | 112.5789                                    | 7.52  | 2.43                            | 106.90         |
|                                         | 20%                | 0.9642                      | 71.9081                                     | 7.40  | 7.31                            | 55.17          |
|                                         | 30%                | 0.9686                      | 52.3921                                     | 7.33  | 13.09                           | 25.30          |
|                                         | 40%                | 0.9722                      | 41.5489                                     | 7.24  | 17.09                           | 18.05          |
|                                         | 50%                | 0.9779                      | 34.2618                                     | 7.04  | ND                              | 10.74          |
| [N <sub>4444</sub> ]CF <sub>3</sub> COO | 10%                | 1.0320                      | 109.6201                                    | 11.01 | 1.43                            | 60.10          |
|                                         | 20%                | 1.0290                      | 68.1774                                     | 10.55 | 4.10                            | 38.33          |
|                                         | 30%                | 1.0281                      | 49.5023                                     | 10.10 | 5.69                            | 26.33          |
|                                         | 40%                | 1.0249                      | 39.0719                                     | 9.72  | 6.81                            | 16.85          |
|                                         | 50%                | 1.0212                      | 32.2960                                     | 9.38  | 7.76                            | 11.41          |
| [P <sub>4444</sub> ]Br                  | 10%                | 1.0469                      | 107.7884                                    | 6.26  | 2.29                            | 81.76          |
|                                         | 20%                | 1.0424                      | 67.3280                                     | 5.59  | 7.44                            | 46.23          |
|                                         | 30%                | 1.0392                      | 49.2676                                     | 5.14  | 12.26                           | 21.82          |
|                                         | 40%                | 1.0335                      | 39.1777                                     | 4.81  | 17.16                           | 16.13          |
|                                         | 50%                | 1.0285                      | 32.4669                                     | 4.63  | ND                              | 12.00          |
| [P <sub>4444</sub> ]Cl                  | 10%                | 0.9552                      | 115.8498                                    | 6.25  | 2.37                            | 94.61          |
|                                         | 20%                | 0.9651                      | 72.9427                                     | 5.71  | 6.96                            | 43.08          |
|                                         | 30%                | 0.9734                      | 53.0244                                     | 5.31  | 11.63                           | 25.62          |
|                                         | 40%                | 0.9797                      | 41.5886                                     | 5.23  | 14.94                           | 17.04          |
|                                         | 50%                | 0.9817                      | 34.2838                                     | 5.19  | 16.5                            | 12.29          |
| [P <sub>4444</sub> ]CF <sub>3</sub> COO | 10%                | 1.03025                     | 115.6351                                    | 4.94  | 1.39                            | 52.10          |
|                                         | 20%                | 1.02505                     | 70.9226                                     | 4.61  | 4.52                            | 30.31          |
|                                         | 30%                | 1.02185                     | 51.1910                                     | 4.34  | 5.92                            | 20.33          |
|                                         | 40%                | 1.0145                      | 40.4593                                     | 4.05  | 7.02                            | 16.30          |
|                                         | 50%                | 1.0112                      | 33.1357                                     | 3.84  | 7.93                            | 12.41          |
| [P <sub>4448</sub> ]Cl                  | 10%                | 0.94385                     | 124.7643                                    | 1.96  | 1.83                            | 124.50         |
|                                         | 20%                | 0.95185                     | 76.3259                                     | 1.71  | 5.66                            | 66.32          |
|                                         | 30%                | 0.95785                     | 55.0911                                     | 1.62  | 8.25                            | 38.33          |
|                                         | 40%                | 0.9605                      | 43.0576                                     | 1.63  | 9.99                            | 29.97          |
|                                         | 50%                | 0.9669                      | 35.1671                                     | 1.69  | 11.63                           | 17.88          |

\*The ND means not measurable

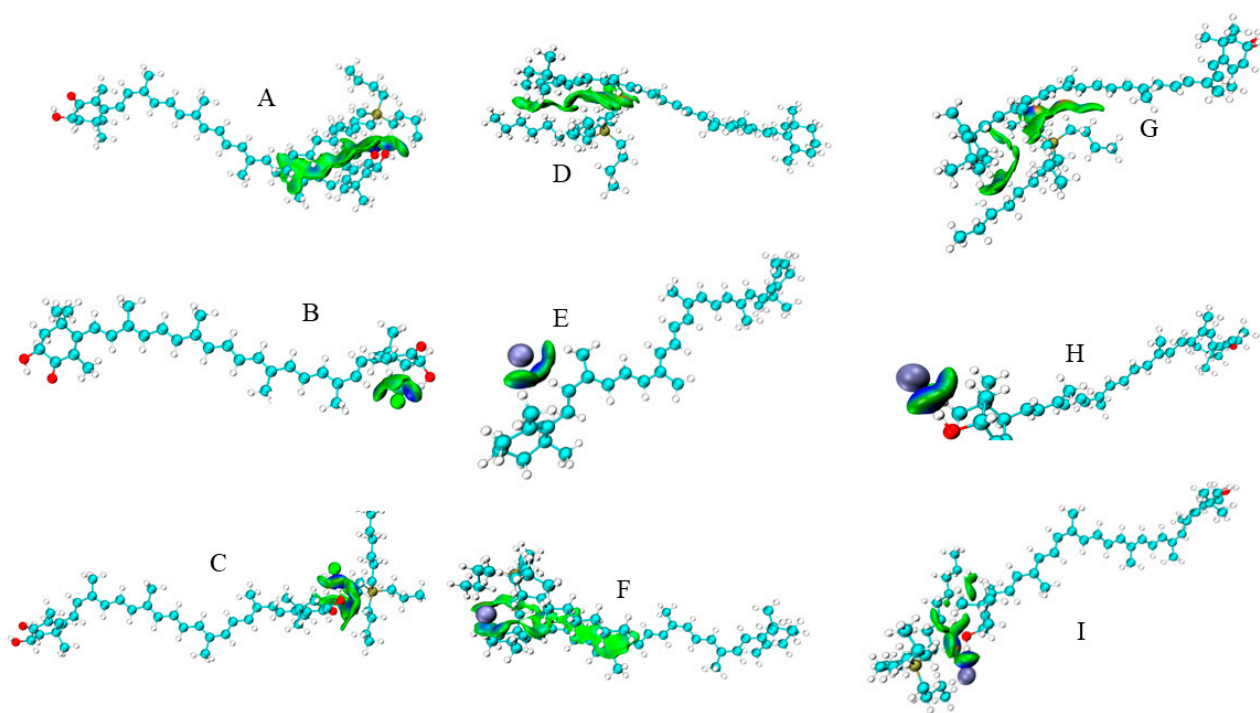

**Figure S1** The scatter diagrams of  $[\text{P}_{4448}]^+$ -astaxanthin (A),  $\text{Cl}^-$ -astaxanthin (B),  $[\text{P}_{4448}]\text{Cl}^-$  astaxanthin (C),  $[\text{P}_{4448}]^+$ - $\beta$ -carotene (D),  $\text{Cl}^-$ - $\beta$ -carotene (E),  $[\text{P}_{4448}]\text{Cl}^-$ - $\beta$ -carotene (F),  $[\text{P}_{4448}]^+$ -lutein (G),  $\text{Cl}^-$ -lutein (H), and  $[\text{P}_{4448}]\text{Cl}^-$ -lutein (I)

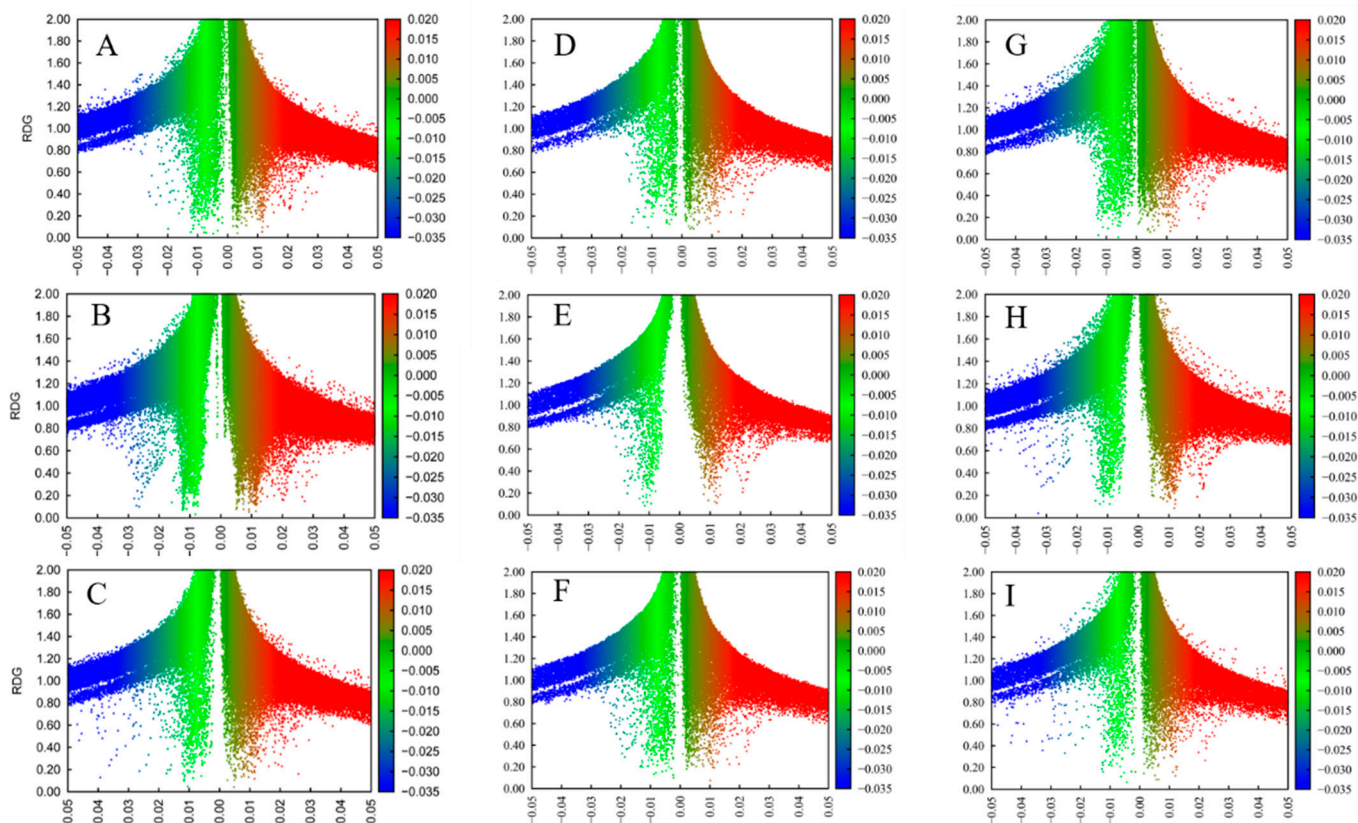

**Figure S2** Plots of reduced density gradient (RDG) versus electron density multiplied by the sign of  $\lambda_2$ : [P<sub>4448</sub>]<sup>+</sup>-astaxanthin (A), Cl-astaxanthin (B), [P<sub>4448</sub>]Cl-astaxanthin (C), [P<sub>4448</sub>]<sup>+</sup>- $\beta$ -carotene (D), Cl- $\beta$ -carotene (E), [P<sub>4448</sub>]Cl- $\beta$ -carotene (F), [P<sub>4448</sub>]<sup>+</sup>-lutein (G), Cl-lutein (H), and [P<sub>4448</sub>]Cl-lutein (I).

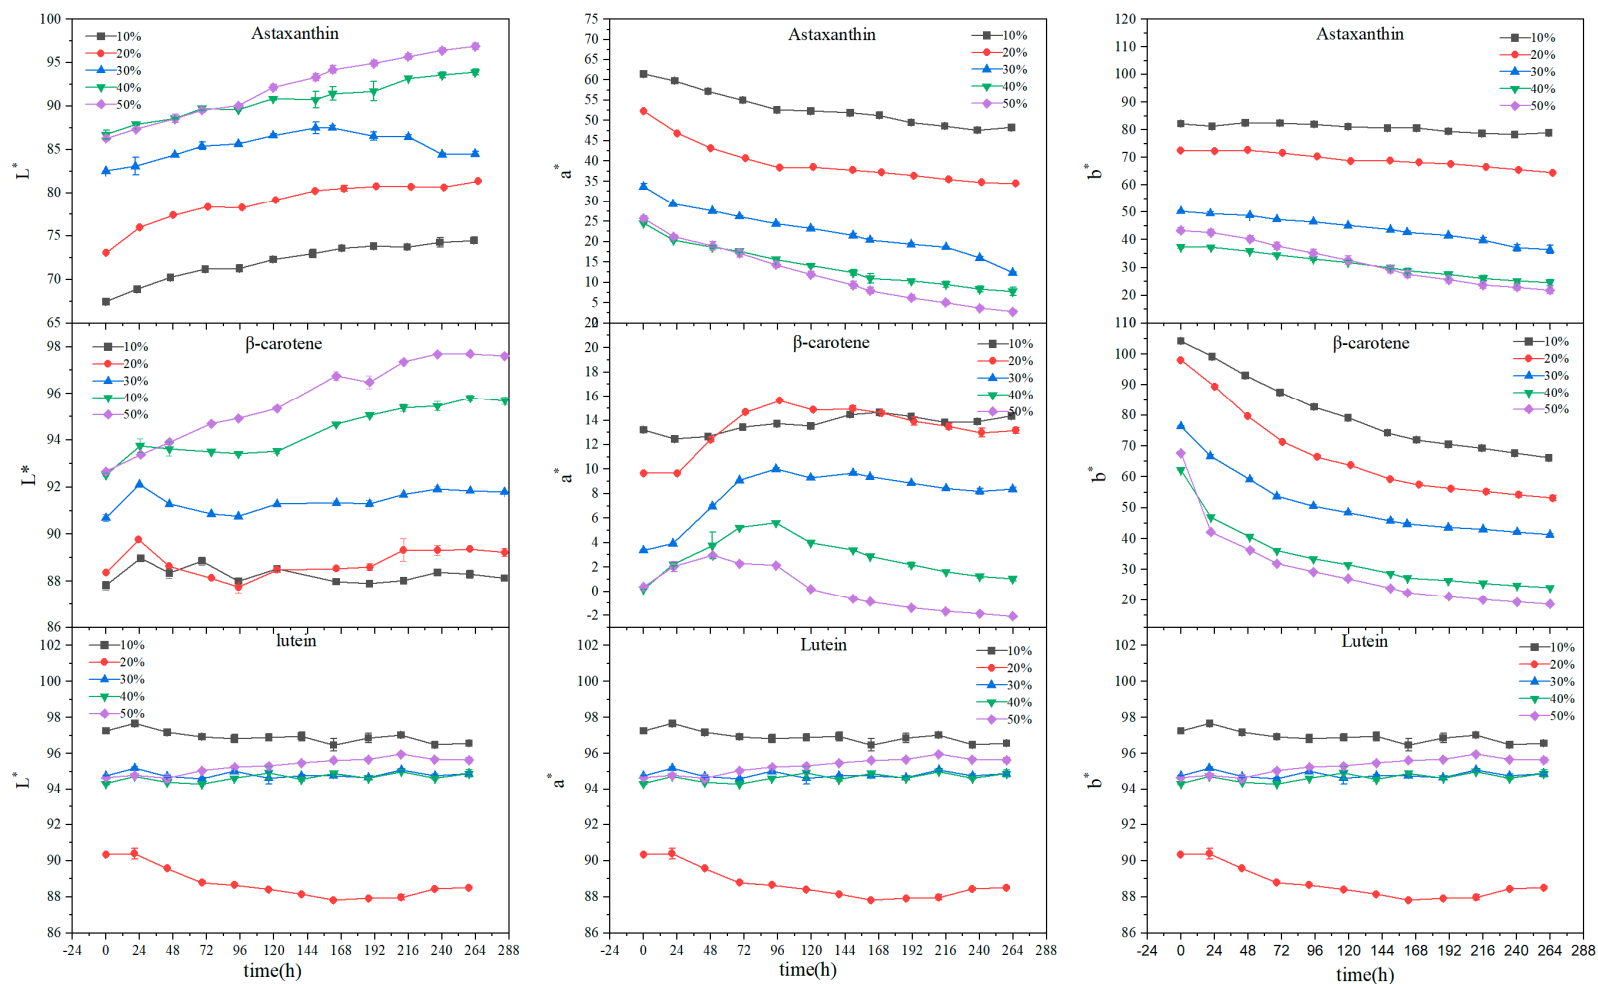

**Figure S3** Color parameters ( $L^*$ ,  $a^*$  and  $b^*$ ) of  $[P_{4448}]Cl$  aqueous solution containing astaxanthin (top),  $\beta$ -carotene (middle) and lutein (bottom) as a function of water content in storage at 25°C in the dark

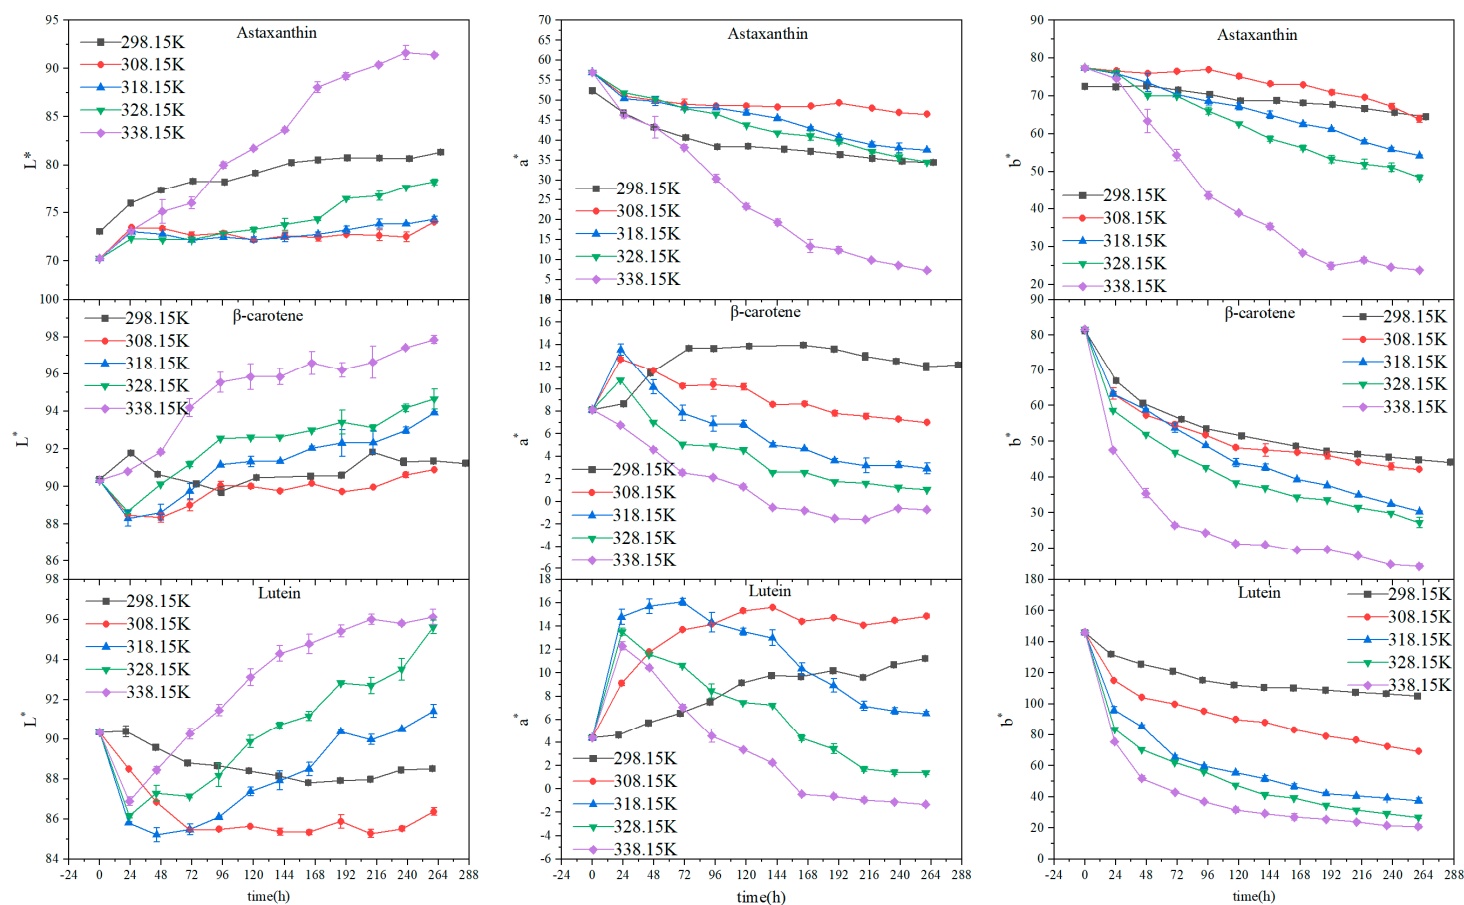

**Figure S4** color parameters ( $L^*$ ,  $a^*$  and  $b^*$ ) of  $[P_{4448}]Cl$  aqueous solution containing astaxanthin (top),  $\beta$ -carotene (middle) and lutein (bottom) as a function of temperature in storage at 20% water in the dark.



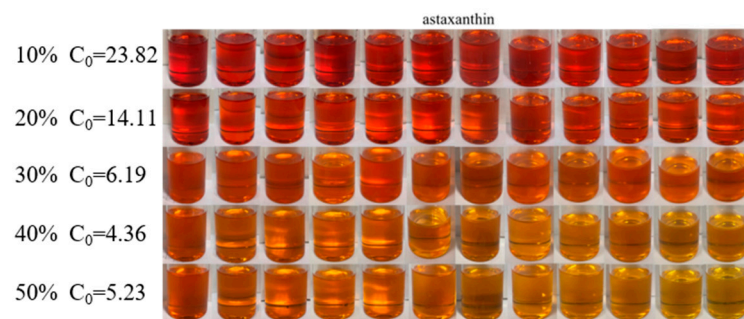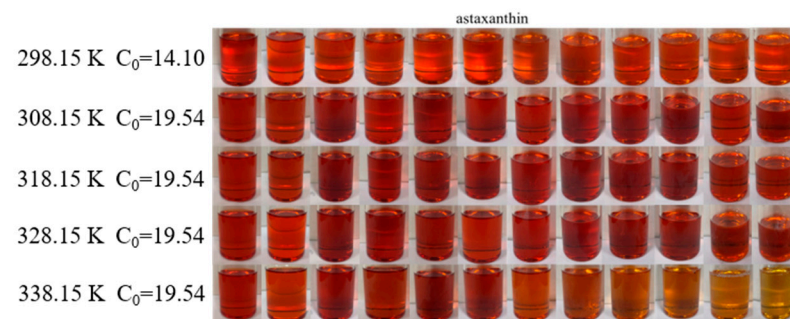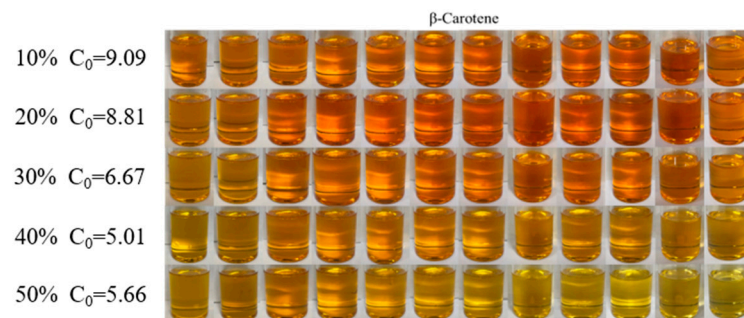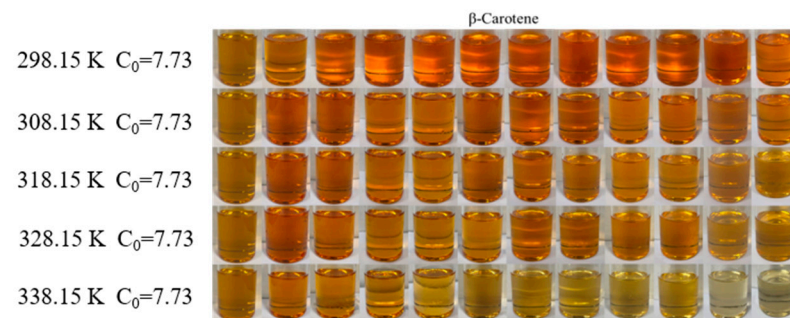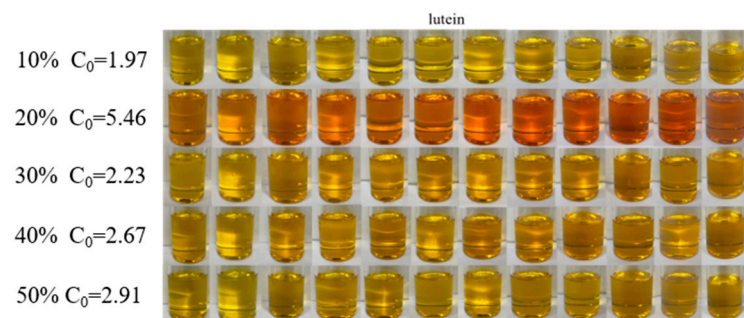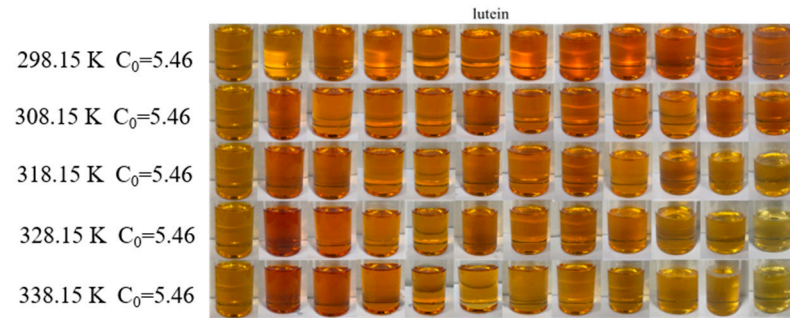

**Figure S5** Pictures of  $[P_{4448}]Cl$  aqueous solution containing astaxanthin (top),  $\beta$ -carotene (middle) and lutein (bottom) as a function of different storage conditions from 0 day to 12 day.  $C_0(\mu g/ml)$  represents the initial concentration of carotenoids in the solution.

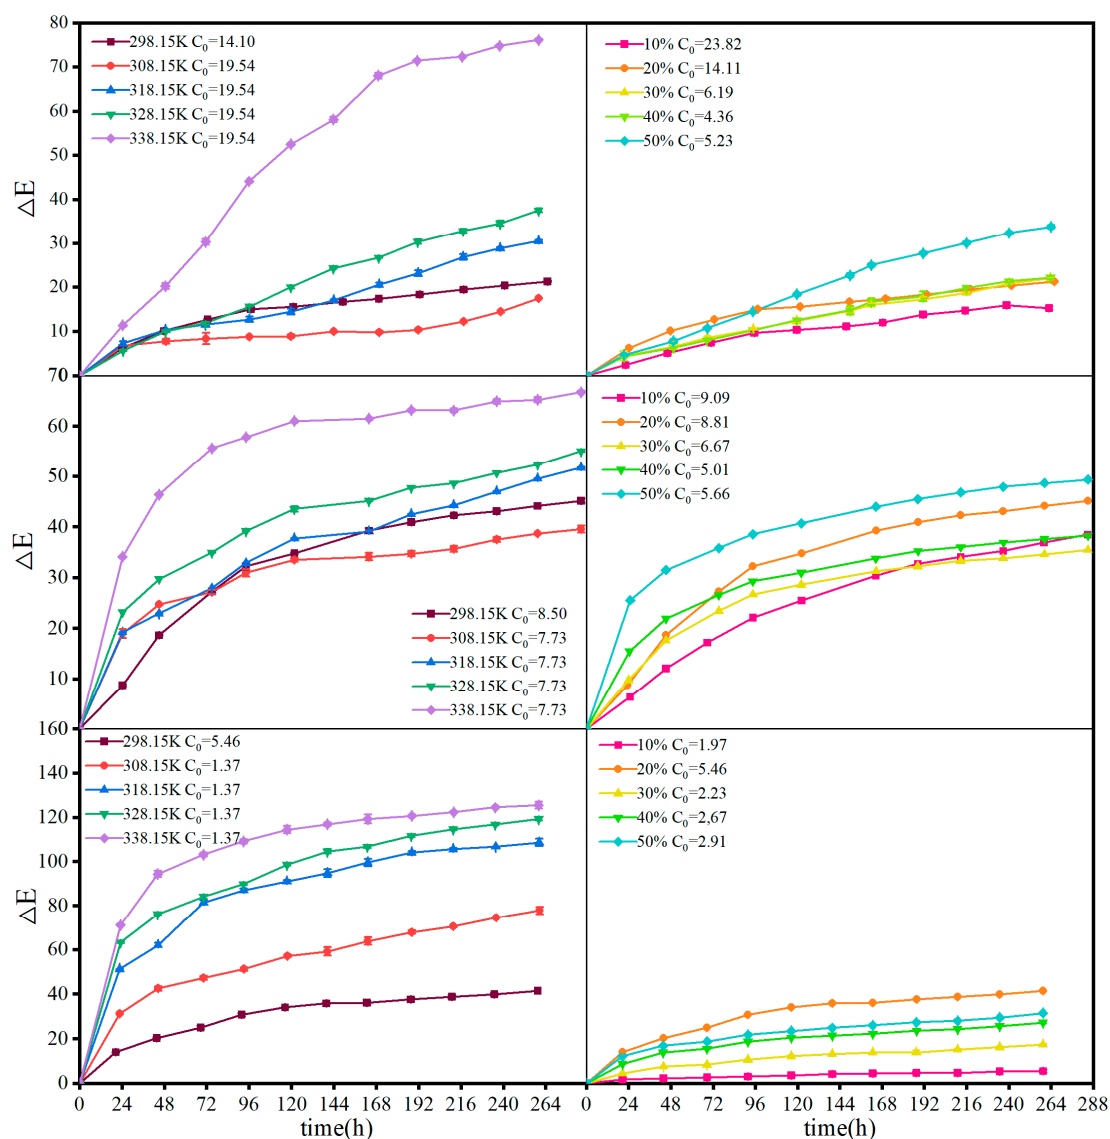

**Figure S6**  $\Delta E$  of [P<sub>4448</sub>]Cl aqueous solutions containing astaxanthin (top),  $\beta$ -carotene (middle), and lutein (bottom) in the storage for 12 days.  $C_0(\mu\text{g/ml})$  represents the initial concentration of carotenoids in the solution.



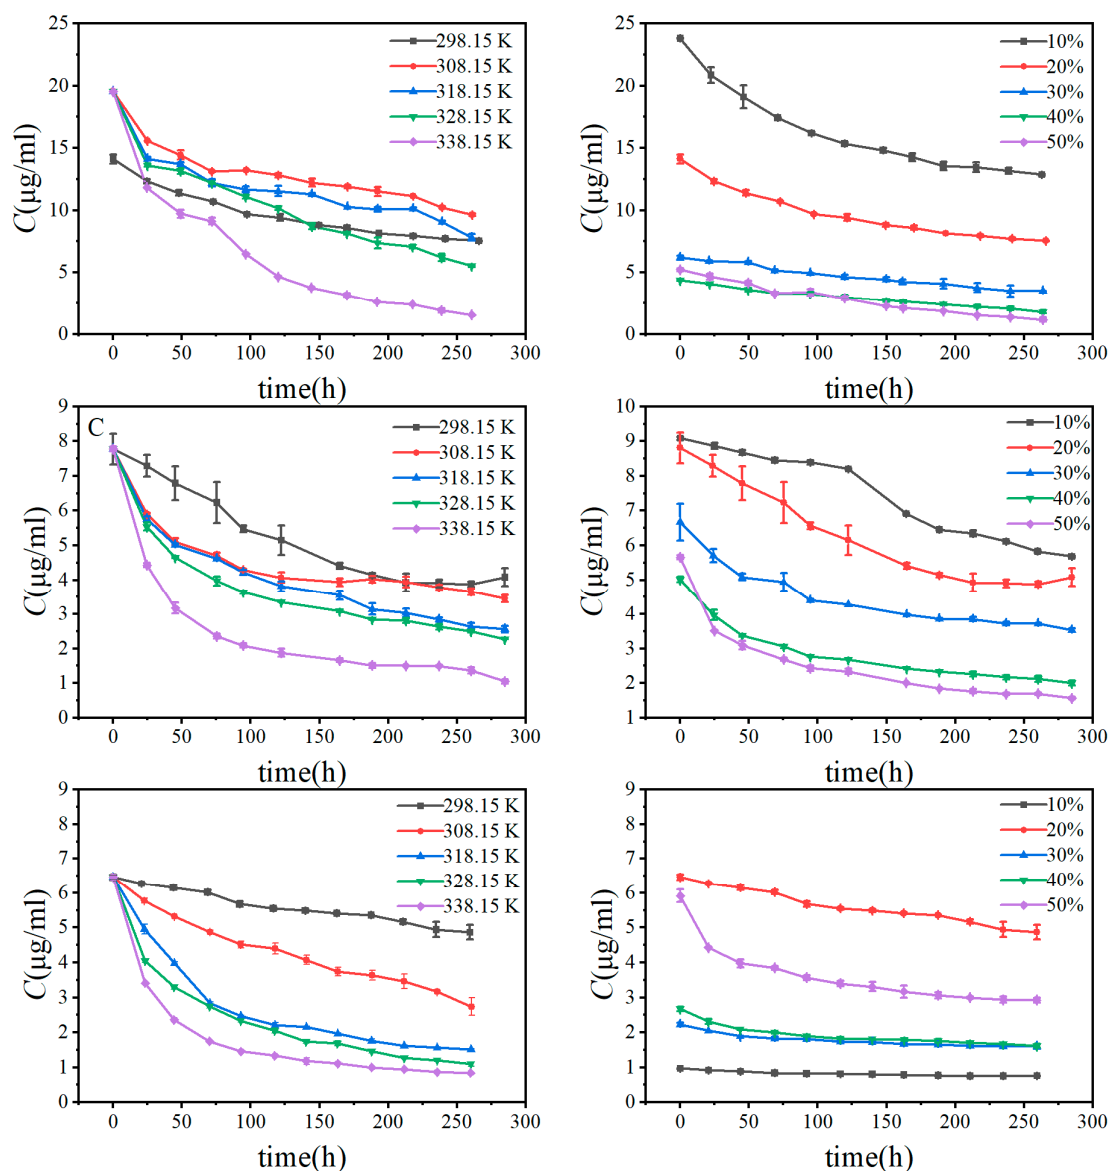

**Figure S7** Concentration( $C$ ) of astaxanthin (top),  $\beta$ -carotene (middle), lutein (bottom) in [P<sub>4448</sub>]Cl aqueous solution in the storage for 12 days.
